# Supplementary material
Source: publisher figshare collection journal article supplement (https://acs.figshare.com/ndownloader/files/9218683)
Supplement: Supplementary file 1 [file 9218683]

Supporting information for

**N<sub>5</sub><sup>-</sup> in Solution: Isotopic Labeling and Further Details of its Synthesis by  
Phenyl Pentazole Reduction.**

Bazanov, Boris; Geiger, Uzi; Haas, Yehuda; The Hebrew University, Jerusalem, Israel.  
Grinstein, Dan; Unaffiliated and Welner, Shmuel; unaffiliated

**Full Range mass spectra.**

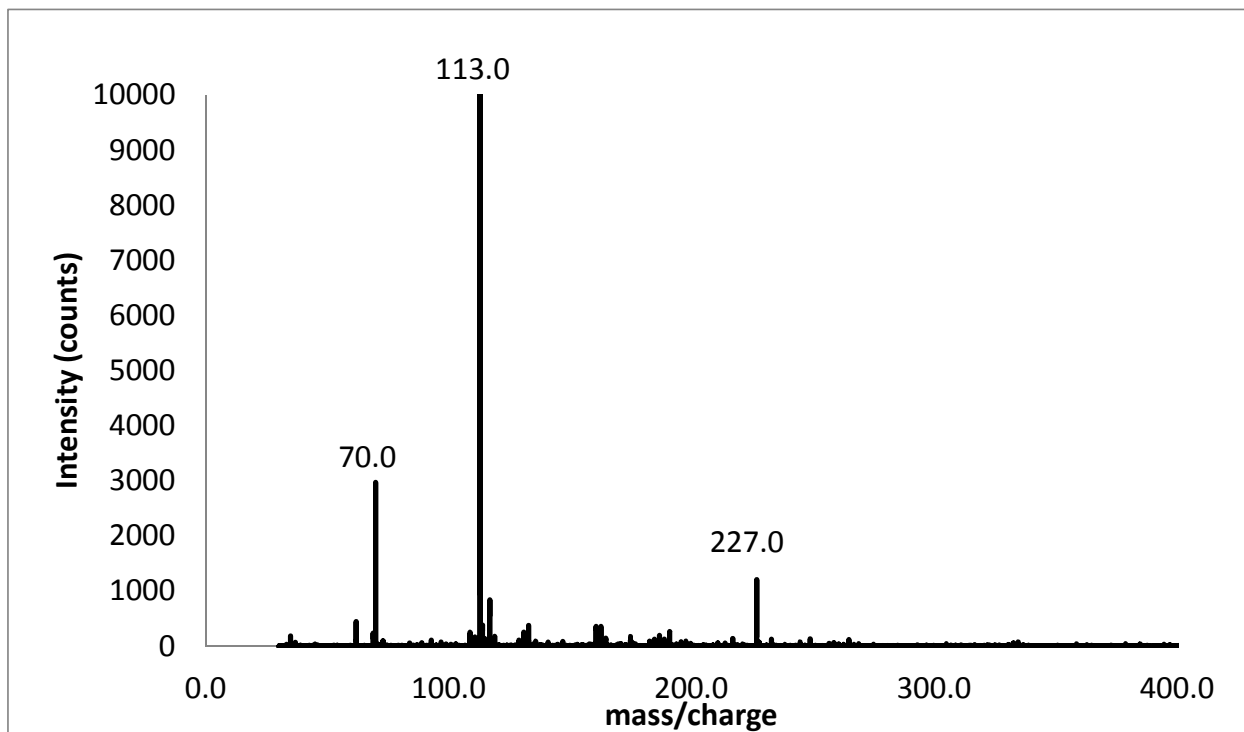

**Figure S1.** Full range mass spectrum of sodium reduced PP in THF solution measured at a retention time of about 2 minutes.

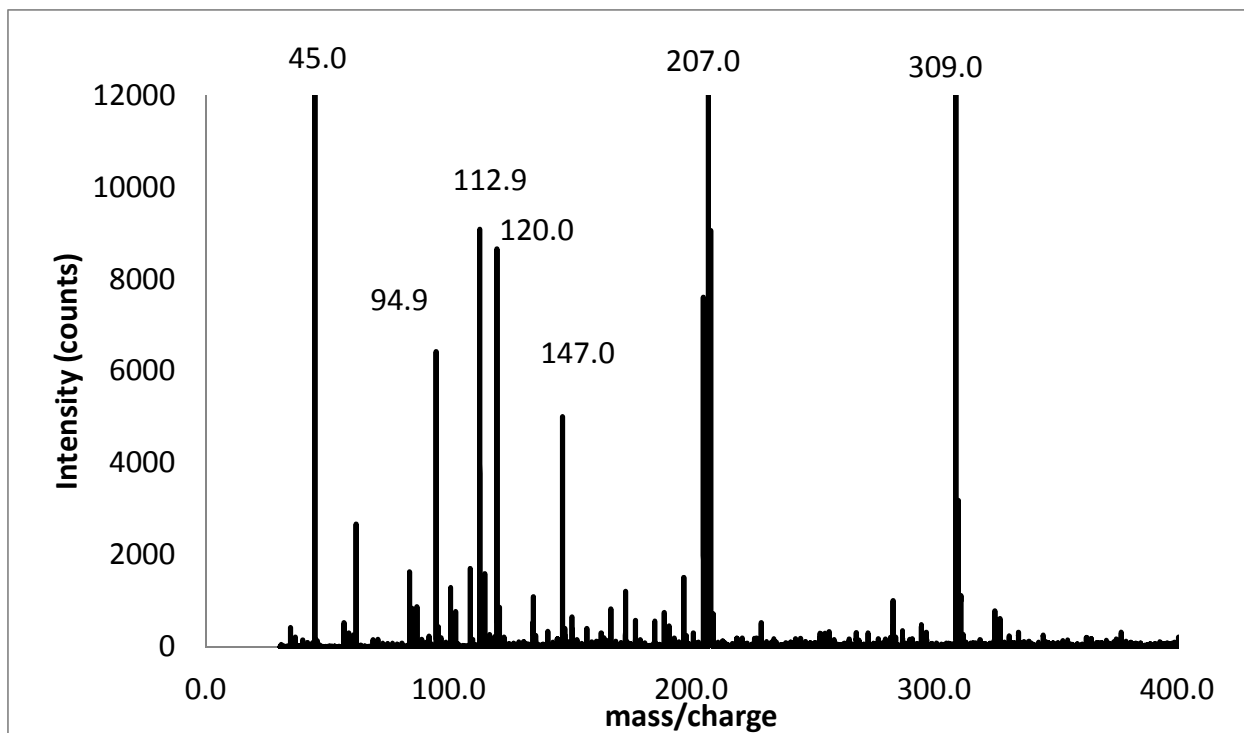

**Figure S2.** Full range mass spectrum of sodium reduced PP in THF solution measured at a retention time of about 8 minutes.
